# Supplementary material for: Identification of a prognosis-associated signature associated with energy metabolism in triple-negative breast cancer
Source: PubMed Central journal article supplement — Oncol Rep. 2020 Jun 23;44(3):819–37. doi: 10.3892/or.2020.7657 (PMC7388543; doi:10.3892/or.2020.7657), 2020-06-23

Figure S1. Comparison of eight-gene signature model with the other existing models. ROC and K-M curves generated using the model by (A) Xie *et al* (45), (B) LV *et al* (46) and (C) Quist *et al* (47). (D) RMS curve comparing the three models with the eight-gene signature; (E) DCA curve comparing the three models with eight-gene signature. ROC, receiver operating characteristic; AUC, area under the curve; K-M, Kaplan-Meier; CI, confidence interval; RMS, root mean square; DCA, decision curve analysis.

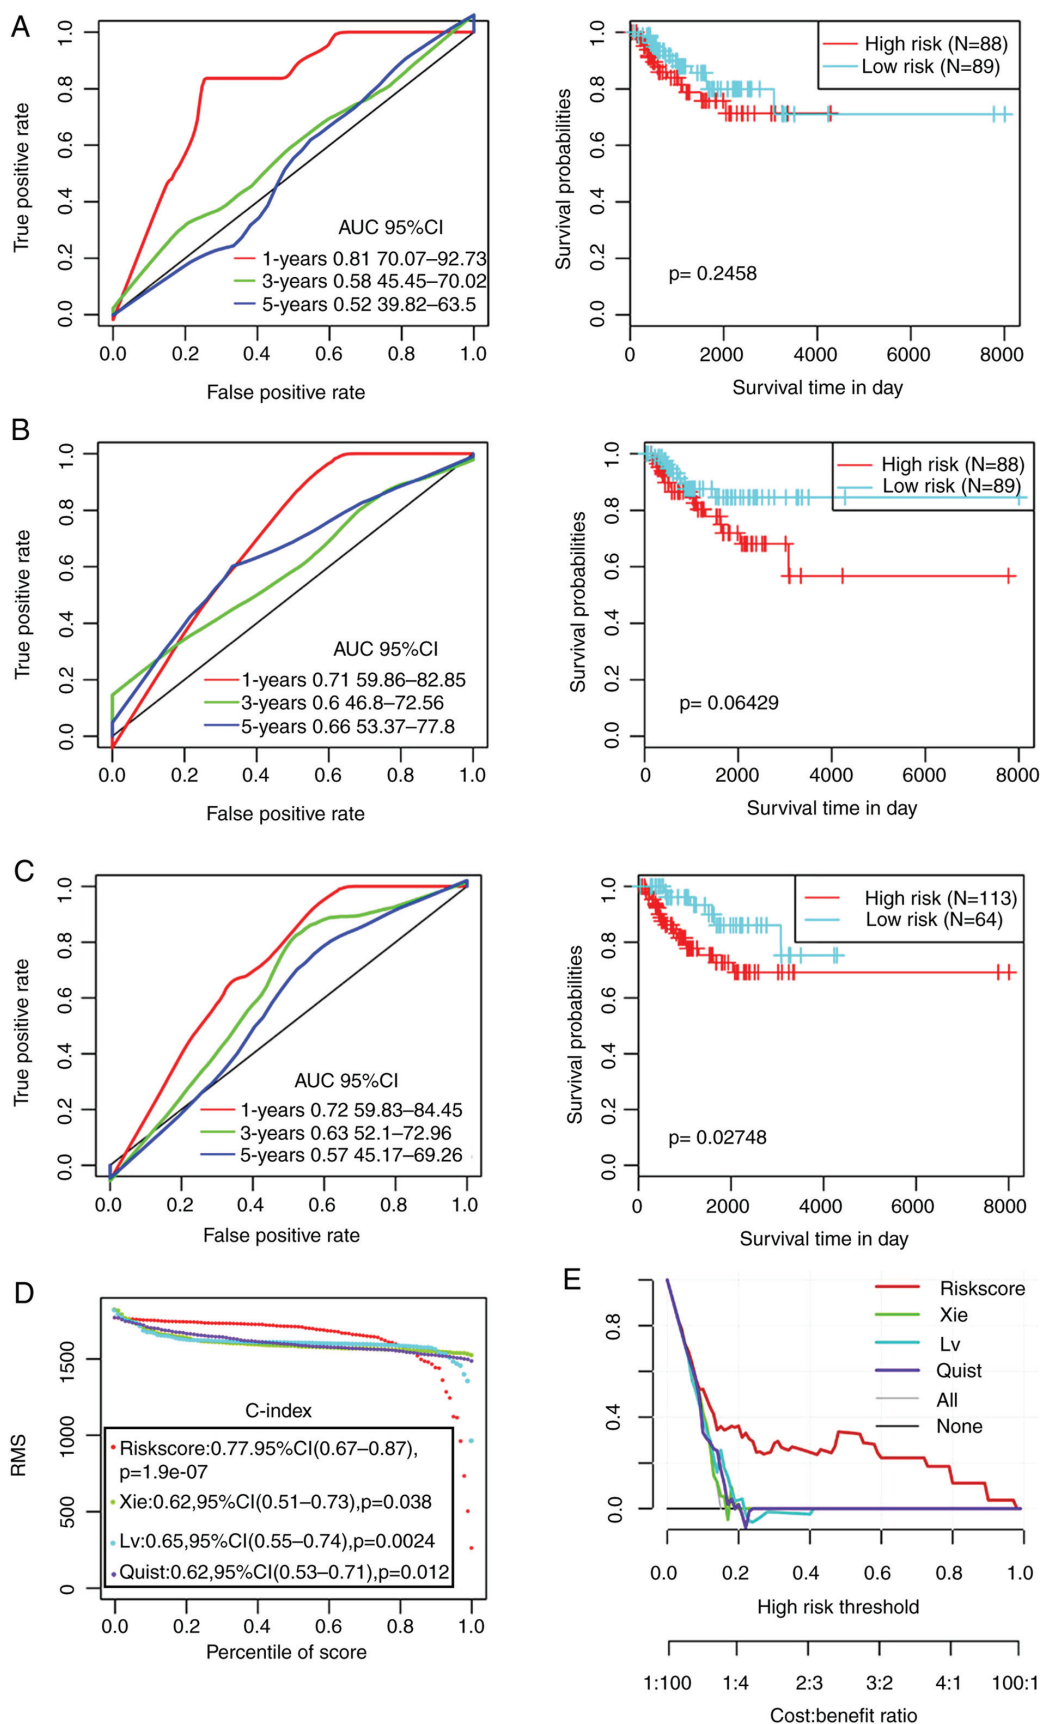

Supplement: Supplementary_Data.pdf [file Supplementary_Data.pdf]
